# Supplementary material for: Effective Population Size Dynamics and the Demographic Collapse of Bornean Orang-Utans
Source: PLoS One. 2012 Nov 15;7(11):e49429. doi: 10.1371/journal.pone.0049429 (PMC3499548; doi:10.1371/journal.pone.0049429)
Supplement: Table S4 — Posterior values of the bottleneck signal obtained with MSVAR 0.4. (XLSX) [file pone.0049429.s007.xlsx]

## Sheet: Table S4
		Danum Valley		LK Lot2		Sabangau		Sungai Lading		Tuanan		Lower Kinabatangan (pooled samples)		Central Kalimantan (pooled samples)
	Model	Exp	Lin	Exp	Lin	Exp	Lin	Exp	Lin	Exp	Lin	Exp	Lin	Exp	Lin
	Mean	-2.50893	-2.70404	-2.97115	-3.00959	-2.88957	-2.98993	-2.81832	-2.89363	-3.17474	-3.25336	-2.46429	-2.41739	-2.71817	-2.77002
	Median	-2.27717	-2.51657	-2.98876	-3.04587	-2.85324	-2.97532	-2.74188	-2.83328	-3.21667	-3.31712	-2.52601	-2.55528	-2.6399	-2.72618
	q.05	-4.51819	-4.65383	-4.77944	-4.77777	-4.75367	-4.77799	-4.68445	-4.70299	-4.72472	-4.72278	-4.69067	-4.75035	-4.70696	-4.70533
	q.95	-1.02621	-1.17912	-1.09508	-1.1709	-1.15354	-1.22464	-1.13716	-1.23578	-1.48671	-1.56272	-0.346284	0.492716	-0.921734	-0.993326
	var	1.29437	1.2274	1.44493	1.38123	1.36443	1.315	1.34052	1.23495	1.04459	0.969807	2.53082	3.12224	1.51225	1.54729
	BF Hyp1	6.18	4.87	2.96	2.94	3.6	3.16	3.79	3.82	2.69	2.93	3.81952	3.07885	4.78476	4.37417
	BF Hyp2	0	0	0	0	0	0	0	0	0	0	0	0	0	0
	Values of quantile 0.05 (q.05), quantile 0.95 (q.95), mean, median and variance (var) of the posterior distribution of N0/N1 (current /ancestral effective population size before the demographic event) obtained with the Beaumont 1999 method for analysis performed with exponential (Exp) and linear (Lin) population size change models. Note that LK Lot2 is Lower Kinabatangan Lot2 population. Bayes fa…
