# Supplementary material for: Effective Population Size Dynamics and the Demographic Collapse of Bornean Orang-Utans
Source: PLoS One. 2012 Nov 15;7(11):e49429. doi: 10.1371/journal.pone.0049429 (PMC3499548; doi:10.1371/journal.pone.0049429)
Supplement: Table S5 — Starting values for MSVAR 1.3. (XLSX) [file pone.0049429.s008.xlsx]

## Sheet: Table S5
		Starting values for priors (mean variance)				Hyperpriors
		log(N0)	log(N1)	logӨ	log(T)	log(N0)	log(N1)	logӨ	log(T)
	Run 1	4 1	4 1	-3.5 1	5 3	3 2 0 0.5	5 3 0 0.5	-3.5 0.25 0 0.2	5 3 0 0.5
	Run 2	4 1	4 2	-3.5 1	5 3	5 3 0 0.5	3 2 0 0.5	-3.5 0.50 0 0.1	5 3 0 0.5
	Run 3	4 2	4 2	-3.5 1	5 1	4 1 0 0.5	4 1 0 0.5	-3.5 0.50 0 0.3	5 3 0 0.5
	Run 4	4 1	4 1	-3.5 1	5 1	3 3 0 0.5	3 3 0 0.5	-3.5 0.25 0 0. 2	5 3 0 0.5
	Column 2-5: For all runs, the starting values for ancestral (N1) and current population (N0) sizes that were assumed to be similar and large (104).These values are updated during the MCMC, using hyperpriors deﬁned by columns 5-8. Columns 6-9: For Run 01, N1 is sampled from a prior log-normal distribution with a mean that is itself drawn from a normal distribution with mean 5 and variance 3 (on a …
