# Supplementary material for: Effective Population Size Dynamics and the Demographic Collapse of Bornean Orang-Utans
Source: PLoS One. 2012 Nov 15;7(11):e49429. doi: 10.1371/journal.pone.0049429 (PMC3499548; doi:10.1371/journal.pone.0049429)
Supplement: Table S6 — Posterior values of the bottleneck signal obtained with MSVAR 1.3. (XLSX) [file pone.0049429.s009.xlsx]

## Sheet: Table S6
			Danum Valley	LK Lot2	Sabangau	Sungai Lading	Tuanan	Central Kalimantan (pooled samples)	Lower Kinabatangan (pooled samples)
	N0	Median	128.583	60.0993	205.311	136.161	85.555	400.053	2984.17
		Mean	78.0149	37.4135	130.588	82.0679	56.8131	287.091	2067.57
		q.5	0.434581	0.179071	0.787154	0.514101	0.323971	3.6205	27.9937
		q.95	2384.33	1452.68	3823.92	2472.71	2309.36	6121.84	37842.9
	N1	Median	5877.26	6664.92	7213.47	6170.76	6090.47	8082.6	8600.97
		Mean	6164.91	6987.04	7460.14	6516.5	6317.1	9017.5	12684.2
		q.5	1438.26	1923.84	1439.58	1531.71	1538.76	1924.47	283.032
		q.95	32481.1	30849.6	47586.6	34179.5	32296.1	52965.4	4.67973e+06
	T	Median (Generation time 8 y)	1114.01	357.99	1499.4	1052.7	516.536	1449.7	5266.35
		Median (Generation time 25 y)	3481	1187.7	4685	3289	1614	3481	1118
		Mean	931.104	254.014	1674.23	857.053	487.642	1795.87	45038.9
		q.5	6.12826	2.30512	7.68508	6.73648	3.59094	14.9504	1.15307
		q.95	45341.7	7548.3	1.0044e+06	37997	22724	963046	1.32471e+10
	Values of quantile 0.05 (q.05), quantile 0.95 (q.95) median and mean of the posterior distribution, N0 (current effective population size), N1 (ancestral effective population size before the demographic event) using a generation time of 8y. T (time in years elapsed since demographic event, using a generation time of both 8 and 25 y). Note that LK Lot2 is Lower Kinabatangan Lot2 population.
